# Supplementary material for: Intellectual disability associated with a homozygous missense mutation in THOC6
Source: PubMed Central journal article supplement (PMC3644499; doi:10.1186/1750-1172-8-62), 2013-04-26

# Supplemental Figure 2

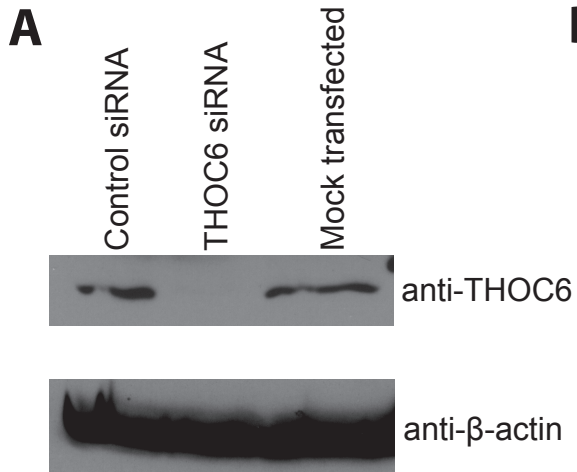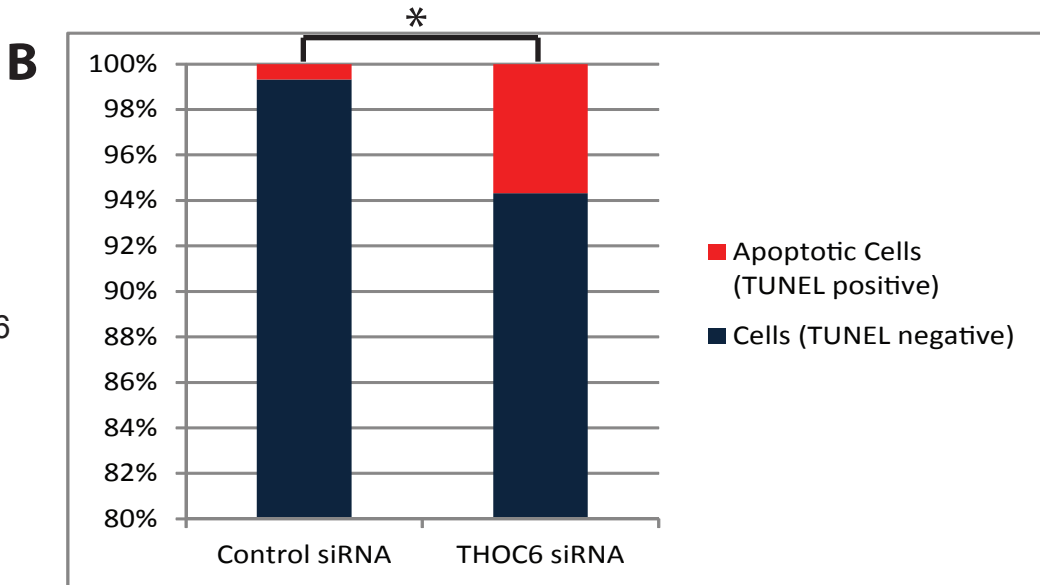

Supplement: 1750-1172-8-62-S3.pdf [file 1750-1172-8-62-S3.pdf]
